# Supplementary material for: A long-term look at homogeneity testing: prospects for a cheaper ‘quality control’ based test
Source: Royal Society of Chemistry journal article supplement (doi:10.1039/c1ay05425b), 2011-01-01
Supplement: c1ay05425b.pdf [file c1ay05425b.pdf]

| Round | Sample | N result 1 | N result 2 | Fat result 1 | Fat result 2 |
|-------|--------|------------|------------|--------------|--------------|
| 165   | 1      | 3.234      | 3.197      | 13.02        | 13.08        |
| 165   | 2      | 3.276      | 3.235      | 12.9         | 12.82        |
| 165   | 3      | 3.211      | 3.255      | 12.91        | 12.85        |
| 165   | 4      | 3.234      | 3.209      | 13.1         | 12.79        |
| 165   | 5      | 3.229      | 3.227      | 13.04        | 12.76        |
| 165   | 6      | 3.248      | 3.28       | 13.12        | 13.05        |
| 165   | 7      | 3.17       | 3.232      | 12.93        | 12.78        |
| 165   | 8      | 3.255      | 3.258      | 12.83        | 13.01        |
| 165   | 9      | 3.275      | 3.257      | 12.95        | 13.04        |
| 165   | 10     | 3.209      | 3.259      | 13.21        | 12.91        |
| 164   | 1      | 3.425      | 3.491      | 16.67        | 16.46        |
| 164   | 2      | 3.45       | 3.461      | 16.53        | 16.5         |
| 164   | 3      | 3.443      | 3.427      | 16.36        | 16.43        |
| 164   | 4      | 3.43       | 3.494      | 16.47        | 16.35        |
| 164   | 5      | 3.422      | 3.426      | 16.39        | 16.47        |
| 164   | 6      | 3.491      | 3.445      | 16.31        | 16.35        |
| 164   | 7      | 3.469      | 3.493      | 16.1         | 16.23        |
| 164   | 8      | 3.45       | 3.441      | 16.75        | 16.29        |
| 164   | 9      | 3.418      | 3.424      | 16.61        | 16.47        |
| 164   | 10     | 3.451      | 3.499      | 16.14        | 16.6         |
| 162   | 1      | 2.119      | 2.188      | 18.84        | 18.54        |
| 162   | 2      | 2.096      | 2.157      | 19.35        | 19.19        |
| 162   | 3      | 2.159      | 2.096      | 18.58        | 18.99        |
| 162   | 4      | 2.13       | 2.138      | 18.79        | 19.03        |
| 162   | 5      | 2.107      | 2.161      | 18.92        | 18.63        |
| 162   | 6      | 2.117      | 2.135      | 18.37        | 18.8         |
| 162   | 7      | 2.209      | 2.168      | 18.57        | 18.99        |
| 162   | 8      | 2.122      | 2.101      | 18.89        | 18.77        |
| 162   | 9      | 2.124      | 2.102      | 18.72        | 19.1         |
| 162   | 10     | 2.104      | 2.109      | 18.93        | 18.97        |
| 160   | 1      | 2.269      | 2.265      | 17.83        | 17.85        |
| 160   | 2      | 2.234      | 2.252      | 17.3         | 17.54        |
| 160   | 3      | 2.232      | 2.26       | 17.99        | 17.81        |
| 160   | 4      | 2.278      | 2.239      | 17.44        | 17.07        |
| 160   | 5      | 2.224      | 2.189      | 17.64        | 17.28        |
| 160   | 6      | 2.256      | 2.274      | 17.13        | 17.41        |
| 160   | 7      | 2.231      | 2.235      | 16.92        | 17.4         |
| 160   | 8      | 2.251      | 2.196      | 16.98        | 16.9         |
| 160   | 9      | 2.26       | 2.221      | 17.53        | 17.38        |
| 160   | 10     | 2.231      | 2.236      | 17.23        | 17.79        |
| 158   | 1      | 3.597      | 3.631      | 9.03         | 9.24         |
| 158   | 2      | 3.64       | 3.642      | 9.25         | 9.34         |
| 158   | 3      | 3.56       | 3.619      | 9.2          | 9.03         |
| 158   | 4      | 3.561      | 3.583      | 9.24         | 9.28         |
| 158   | 5      | 3.589      | 3.644      | 9.39         | 9.31         |
| 158   | 6      | 3.601      | 3.672      | 9.2          | 9.25         |
| 158   | 7      | 3.651      | 3.62       | 9.29         | 9.2          |
| 158   | 8      | 3.673      | 3.616      | 9.11         | 9            |
| 158   | 9      | 3.595      | 3.612      | 9.18         | 9.21         |
| 158   | 10     | 3.639      | 3.599      | 9.21         | 9.03         |
| 157   | 1      | 3.67       | 3.75       | 9.16         | 9.03         |
| 157   | 2      | 3.68       | 3.68       | 8.81         | 8.98         |
| 157   | 3      | 3.65       | 3.7        | 8.92         | 9.26         |
| 157   | 4      | 3.62       | 3.56       | 8.76         | 9.27         |
| 157   | 5      | 3.64       | 3.57       | 9.09         | 9.23         |

|     |    |       |       |       |       |
|-----|----|-------|-------|-------|-------|
| 157 | 6  | 3.65  | 3.67  | 9.02  | 9.16  |
| 157 | 7  | 3.7   | 3.73  | 8.99  | 9.1   |
| 157 | 8  | 3.55  | 3.53  | 8.81  | 9.02  |
| 157 | 9  | 3.57  | 3.61  | 9.13  | 8.59  |
| 157 | 10 | 3.62  | 3.78  | 8.96  | 9.24  |
| 155 | 1  | 2.175 | 2.157 | 20.92 | 21.01 |
| 155 | 2  | 2.171 | 2.207 | 19.99 | 20.61 |
| 155 | 3  | 2.184 | 2.147 | 19.67 | 19.9  |
| 155 | 4  | 2.171 | 2.169 | 20.45 | 19.89 |
| 155 | 5  | 2.207 | 2.214 | 19.98 | 20.5  |
| 155 | 6  | 2.12  | 2.144 | 21.18 | 20.88 |
| 155 | 7  | 2.162 | 2.143 | 20.02 | 20.12 |
| 155 | 8  | 2.206 | 2.134 | 19.93 | 20.73 |
| 155 | 9  | 2.18  | 2.162 | 20.25 | 19.92 |
| 155 | 10 | 2.139 | 2.167 | 20.27 | 19.96 |
| 153 | 1  | 3.327 | 3.272 | 13.01 | 12.83 |
| 153 | 2  | 3.286 | 3.316 | 13.15 | 12.85 |
| 153 | 3  | 3.31  | 3.34  | 12.94 | 13.04 |
| 153 | 4  | 3.326 | 3.31  | 12.96 | 13    |
| 153 | 5  | 3.257 | 3.31  | 12.92 | 12.97 |
| 153 | 6  | 3.312 | 3.282 | 13.02 | 12.89 |
| 153 | 7  | 3.295 | 3.274 | 13.15 | 13.23 |
| 153 | 8  | 3.306 | 3.285 | 13.06 | 12.84 |
| 153 | 9  | 3.276 | 3.26  | 12.97 | 13.01 |
| 153 | 10 | 3.294 | 3.335 | 13.16 | 13.23 |
| 152 | 1  | 2.99  | 2.99  | 2.51  | 2.36  |
| 152 | 2  | 2.96  | 2.98  | 2.54  | 2.56  |
| 152 | 3  | 2.93  | 2.99  | 2.61  | 2.55  |
| 152 | 4  | 2.98  | 3.01  | 2.59  | 2.61  |
| 152 | 5  | 2.94  | 2.99  | 2.6   | 2.53  |
| 152 | 6  | 2.91  | 3.01  | 2.57  | 2.62  |
| 152 | 7  | 2.94  | 3.01  | 2.47  | 2.64  |
| 152 | 8  | 2.94  | 2.94  | 2.56  | 2.66  |
| 152 | 9  | 2.94  | 2.96  | 2.51  | 2.5   |
| 152 | 10 | 2.91  | 2.98  | 2.63  | 2.55  |
| 151 | 1  | 3.653 | 3.623 | 9.19  | 9.33  |
| 151 | 2  | 3.615 | 3.628 | 9.47  | 9.2   |
| 151 | 3  | 3.632 | 3.628 | 9.3   | 9.36  |
| 151 | 4  | 3.631 | 3.592 | 9.26  | 9.33  |
| 151 | 5  | 3.59  | 3.618 | 9.42  | 9.26  |
| 151 | 6  | 3.624 | 3.609 | 9.42  | 9.35  |
| 151 | 7  | 3.633 | 3.646 | 9.43  | 9.43  |
| 151 | 8  | 3.613 | 3.632 | 9.51  | 9.14  |
| 151 | 9  | 3.629 | 3.616 | 9.29  | 9.28  |
| 151 | 10 | 3.609 | 3.642 | 9.22  | 9.3   |
| 148 | 1  | 1.96  | 1.98  | 24.92 | 25.22 |
| 148 | 2  | 2.01  | 1.97  | 25.74 | 25.15 |
| 148 | 3  | 1.97  | 1.97  | 24.86 | 24.95 |
| 148 | 4  | 2     | 2.01  | 25.02 | 25.59 |
| 148 | 5  | 1.98  | 2.01  | 25.18 | 25.44 |
| 148 | 6  | 2     | 2     | 24.5  | 24.77 |
| 148 | 7  | 2.02  | 2     | 24.66 | 25.6  |
| 148 | 8  | 1.99  | 2     | 25.23 | 25.91 |
| 148 | 9  | 2.01  | 2.09  | 24.63 | 25.47 |
| 148 | 10 | 1.98  | 1.97  | 25.02 | 24.13 |
| 147 | 1  | 2.839 | 2.852 | 2.55  | 2.49  |

|     |    |       |       |       |       |
|-----|----|-------|-------|-------|-------|
| 147 | 2  | 2.874 | 2.858 | 2.54  | 2.57  |
| 147 | 3  | 2.892 | 2.894 | 2.64  | 2.67  |
| 147 | 4  | 2.865 | 2.839 | 2.64  | 2.65  |
| 147 | 5  | 2.843 | 2.881 | 2.53  | 2.62  |
| 147 | 6  | 2.892 | 2.861 | 2.59  | 2.6   |
| 147 | 7  | 2.831 | 2.877 | 2.49  | 2.64  |
| 147 | 8  | 2.851 | 2.885 | 2.62  | 2.53  |
| 147 | 9  | 2.858 | 2.876 | 2.58  | 2.52  |
| 147 | 10 | 2.847 | 2.839 | 2.56  | 2.56  |
| 145 | 1  | 1.979 | 2.004 | 25.83 | 25.51 |
| 145 | 2  | 2.029 | 2.03  | 25.63 | 25.59 |
| 145 | 3  | 2.004 | 2.017 | 25.57 | 25.54 |
| 145 | 4  | 2.006 | 2.028 | 25.52 | 25.64 |
| 145 | 5  | 1.987 | 2.002 | 25.64 | 25.52 |
| 145 | 6  | 2.006 | 2.023 | 25.55 | 25.77 |
| 145 | 7  | 1.99  | 2.024 | 25.39 | 25.48 |
| 145 | 8  | 2.021 | 2     | 25.46 | 25.3  |
| 145 | 9  | 1.995 | 2.033 | 25.67 | 25.81 |
| 145 | 10 | 2.014 | 2.006 | 25.54 | 25.88 |
| 144 | 1  | 2.77  | 2.79  | 21.57 | 21.39 |
| 144 | 2  | 2.76  | 2.69  | 23.03 | 22.18 |
| 144 | 3  | 2.78  | 2.8   | 23.31 | 21.75 |
| 144 | 4  | 2.72  | 2.67  | 22.76 | 21.94 |
| 144 | 5  | 2.68  | 2.76  | 22.26 | 21.54 |
| 144 | 6  | 2.66  | 2.59  | 21.58 | 22.38 |
| 144 | 7  | 2.8   | 2.73  | 22.18 | 22.49 |
| 144 | 8  | 2.78  | 2.81  | 22.17 | 22.17 |
| 144 | 9  | 2.72  | 2.61  | 21.94 | 22.08 |
| 144 | 10 | 2.8   | 2.74  | 21.64 | 23.7  |
| 143 | 1  | 2.91  | 2.91  | 9.24  | 9.38  |
| 143 | 2  | 2.86  | 2.91  | 9.49  | 8.95  |
| 143 | 3  | 2.9   | 2.92  | 9.69  | 9.18  |
| 143 | 4  | 2.93  | 2.95  | 9.27  | 8.9   |
| 143 | 5  | 2.92  | 2.9   | 9.09  | 9.25  |
| 143 | 6  | 2.89  | 2.91  | 9.35  | 9.1   |
| 143 | 7  | 2.94  | 2.87  | 9.29  | 9.38  |
| 143 | 8  | 2.89  | 2.94  | 9.15  | 9.42  |
| 143 | 9  | 2.89  | 2.93  | 9.4   | 9.22  |
| 143 | 10 | 2.9   | 2.91  | 8.94  | 9     |
| 141 | 1  | 2.75  | 2.75  | 21.59 | 21.21 |
| 141 | 2  | 2.69  | 2.68  | 21.35 | 21.2  |
| 141 | 3  | 2.73  | 2.74  | 21.29 | 21.23 |
| 141 | 4  | 2.7   | 2.73  | 21.38 | 21.48 |
| 141 | 5  | 2.75  | 2.7   | 21.55 | 21.24 |
| 141 | 6  | 2.75  | 2.76  | 21.3  | 21.49 |
| 141 | 7  | 2.69  | 2.7   | 21.25 | 21.41 |
| 141 | 8  | 2.77  | 2.75  | 21.37 | 21.31 |
| 141 | 9  | 2.76  | 2.69  | 21.52 | 21.48 |
| 141 | 10 | 2.74  | 2.66  | 21.51 | 21.33 |
| 140 | 1  | 2.46  | 2.46  | 10.5  | 10.59 |
| 140 | 2  | 2.33  | 2.36  | 10.57 | 10.6  |
| 140 | 3  | 2.46  | 2.42  | 10.83 | 10.85 |
| 140 | 4  | 2.36  | 2.4   | 10.69 | 10.67 |
| 140 | 5  | 2.4   | 2.39  | 10.91 | 10.83 |
| 140 | 6  | 2.38  | 2.43  | 10.85 | 10.88 |
| 140 | 7  | 2.35  | 2.42  | 10.93 | 10.88 |

|     |    |       |       |       |       |
|-----|----|-------|-------|-------|-------|
| 140 | 8  | 2.4   | 2.4   | 10.82 | 10.86 |
| 140 | 9  | 2.35  | 2.45  | 10.68 | 10.82 |
| 140 | 10 | 2.4   | 2.38  | 10.78 | 10.85 |
| 139 | 1  | 2.866 | 2.843 | 9.39  | 9.1   |
| 139 | 2  | 2.851 | 2.871 | 9.27  | 9.12  |
| 139 | 3  | 2.855 | 2.873 | 9.49  | 9.71  |
| 139 | 4  | 2.873 | 2.872 | 9.28  | 9.56  |
| 139 | 5  | 2.834 | 2.86  | 8.97  | 9.14  |
| 139 | 6  | 2.87  | 2.881 | 9.5   | 9.28  |
| 139 | 7  | 2.866 | 2.837 | 9.05  | 9.11  |
| 139 | 8  | 2.862 | 2.834 | 9.1   | 9.3   |
| 139 | 9  | 2.872 | 2.836 | 9.12  | 9.2   |
| 139 | 10 | 2.837 | 2.865 | 9.36  | 9.29  |
| 137 | 1  | 2.325 | 2.284 | 11.16 | 11.26 |
| 137 | 2  | 2.319 | 2.343 | 11.29 | 10.74 |
| 137 | 3  | 2.334 | 2.339 | 11.04 | 10.97 |
| 137 | 4  | 2.337 | 2.341 | 10.92 | 11.02 |
| 137 | 5  | 2.323 | 2.319 | 10.95 | 11.13 |
| 137 | 6  | 2.338 | 2.332 | 11.15 | 11.16 |
| 137 | 7  | 2.337 | 2.304 | 11.1  | 11.11 |
| 137 | 8  | 2.309 | 2.332 | 11.17 | 10.98 |
| 137 | 9  | 2.345 | 2.334 | 11.1  | 11.05 |
| 137 | 10 | 2.341 | 2.317 | 11.03 | 11.07 |
| 136 | 1  | 2.13  | 2.15  | 14.5  | 14.4  |
| 136 | 2  | 2.11  | 2.15  | 14.6  | 14.6  |
| 136 | 3  | 2.14  | 2.15  | 14.8  | 14.5  |
| 136 | 4  | 2.15  | 2.13  | 14.8  | 15    |
| 136 | 5  | 2.13  | 2.13  | 15    | 15    |
| 136 | 6  | 2.14  | 2.17  | 14.9  | 14.8  |
| 136 | 7  | 2.1   | 2.13  | 14.9  | 14.4  |
| 136 | 8  | 2.16  | 2.13  | 15.3  | 14.8  |
| 136 | 9  | 2.16  | 2.13  | 14.7  | 14.8  |
| 136 | 10 | 2.17  | 2.13  | 14.8  | 14.6  |
